# Supplementary material for: Mechanochromic and photochromic dual-responsive properties of an amino acid based molecule in polymorphic phase
Source: Royal Society of Chemistry journal article supplement (doi:10.1039/c4ra00895b), 2014-01-01
Supplement: c4ra00895b1.pdf [file c4ra00895b1.pdf]

## Supporting Information

### Mechano- and Photochromic Dual-responsive Properties of an Amino Acid-based Molecule in Polymorphic Phase

Mingjun Teng<sup>a</sup>, Zhijian Wang<sup>a</sup>, Zhiyong Ma<sup>a</sup>, Xiaofang Chen<sup>b</sup> and Xinru Jia<sup>a\*</sup>

#### 1. Synthesis of the targeted molecule

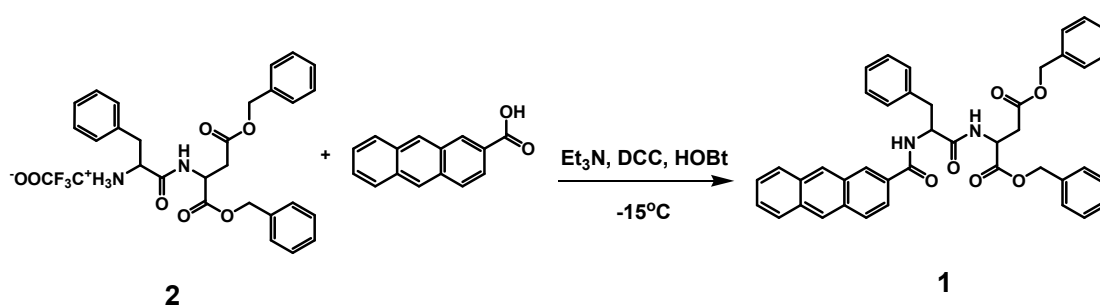

To a stirring CHCl<sub>3</sub> solution of **2**<sup>[S1]</sup> (0.3 g, 0.5 mmol), 0.5 ml Et<sub>3</sub>N and 2-anthracene-carboxylic acid (0.18 g 0.8 mmol) were mixed at -15°C. Then N,N'-dicyclohexylcarbodiimide (0.19 g, 0.9 mmol) and N-Hydroxybenzotriazole (5 mg, 0.03 mmol) were added slowly. After the solution was stirred for 2 days, the mixture was concentrated under vacuum. **1** was purified the silica gel column chromatography using CH<sub>2</sub>Cl<sub>2</sub>/THF (10:1) as the eluent (yield: 80 %).

<sup>1</sup>H NMR (500 MHz, CDCl<sub>3</sub>, δ): 8.43-8.41 (d, 2H), 8.37 (s, 1H), 8.00-7.98 (m, 3H), 7.71-7.70 (d, 1H), 7.52-7.49 (m, 2H), 7.31-7.26 (m, 15H), 7.05-7.00 (dd, 2H), 5.15 (s, 2H), 5.05-5.00 (m, 3H), 4.92 (b, 1H), 3.21-3.21 (m, 2H), 3.09-2.91 (dd, 2H)

<sup>13</sup>C NMR (125 MHz, CDCl<sub>3</sub>, δ): 170.75, 170.41, 169.95, 167.16, 136.19, 135.21, 135.03, 132.76, 132.15, 132.04, 130.40, 130.32, 129.43, 128.84, 128.66, 128.58, 128.56, 128.51, 128.49, 128.40, 128.32, 128.14, 128.10, 127.09, 126.33, 126.20,

125.85, 122.67, 67.63, 66.87, 54.54, 48.88, 38.29, 36.23

Element Calcd for  $C_{42}H_{36}N_2O_6$ : C 75.89; H 5.46, N 4.21. Found. C 75.66; H 5.61, N 4.17.

HR-ESI Calcd. For  $C_{42}H_{36}N_2O_6$ : 664.2646. Found.  $[M+H]^+$ : 665.2654,  $[M+Na]^+$ : 687.2471

## 2. Thermogravimetric analysis (TGA) of original sample of 1.

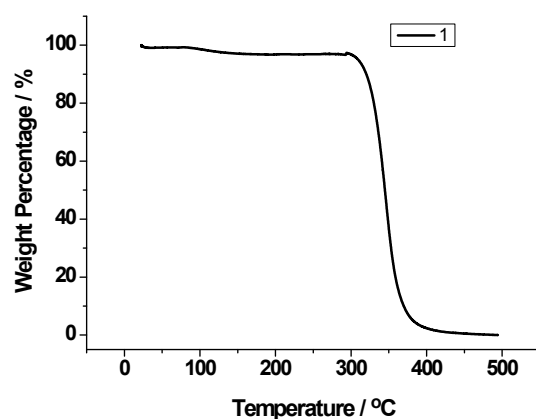

Figure S1. TGA curve of original sample of 1.

## 3. IR spectra of the sample before and after shearing

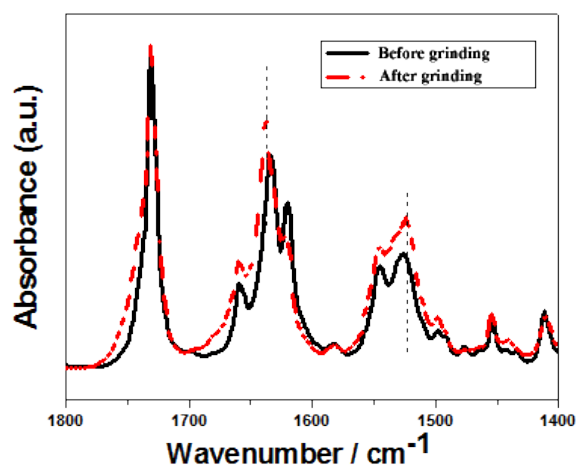

Figure S2. FT-IR spectra of the sample before (black) and after grinding (red).

#### 4. AFM image of O-xerogel

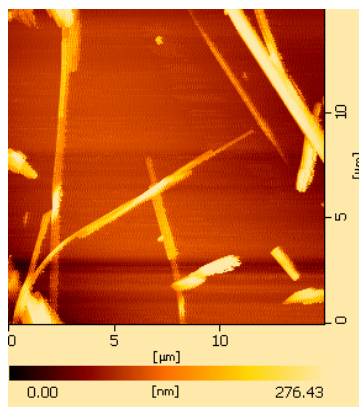

Figure S3. AFM image of O-xerogel sample.

#### 5. Optical property of grinding sample with different radiation time.

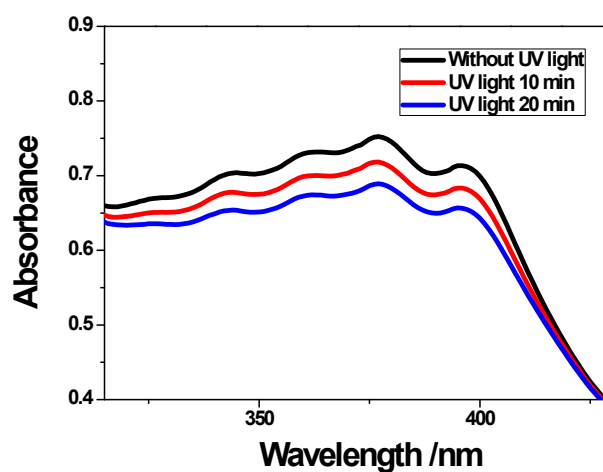

Figure S4. UV-vis absorption spectra of grinding sample irradiated with different time.

## 6. POM images of O-xerogel before and after grinding.

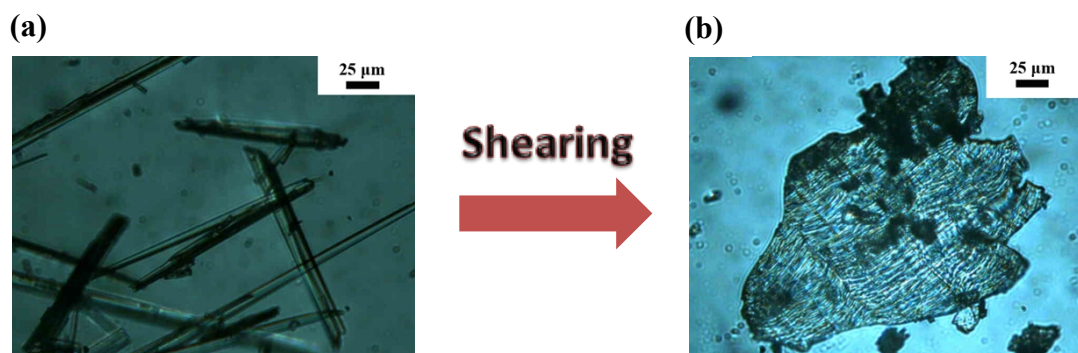

Figure S5. POM images of the tapes (a) before and (b) after grinding.

## 7. The mass spectra of grinding sample upon UV irradiation

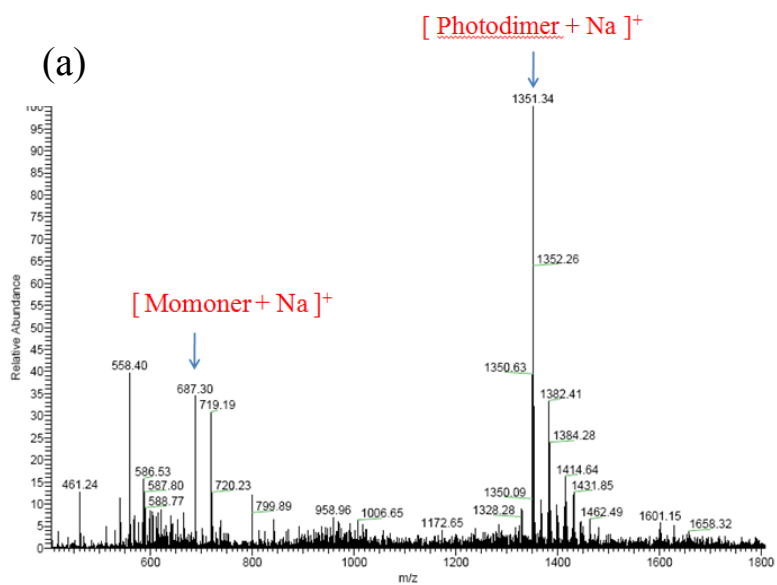

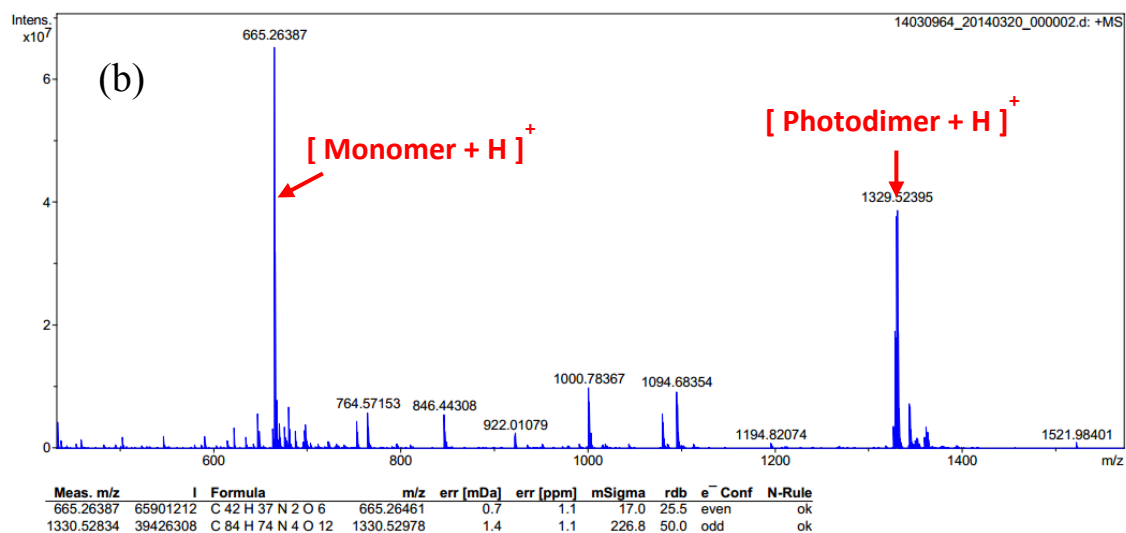

**Figure S6.** (a) low resolution MS and (b) high resolution MS spectrum of grinding sample upon UV irradiation

## 8. The switching cycles of the sample by grinding and heating

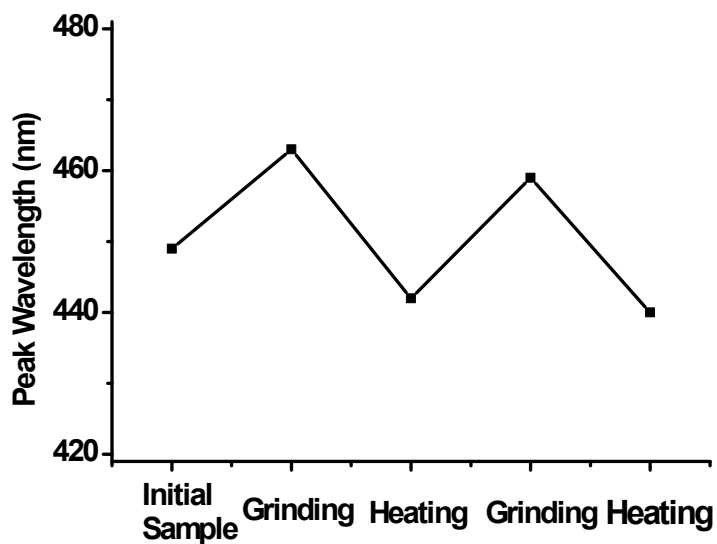

**Figure S7.** The switching cycles of the sample by grinding and heating.

[S1] Teng, M. J.; Jia, X. R.; Yang, S.; Chen, X. F.; Wei, Y. *Adv. Mater.*, **2012**, *24*, 1255–1261.
